# Supplementary material for: Significant enhancement in the magnetic properties of Cr2Te3 nanosheets by atom substitution doping
Source: Royal Society of Chemistry journal article supplement (doi:10.1039/d4nr02767a), 2024-01-01
Supplement: d4nr02767a1.pdf [file d4nr02767a1.pdf]

Supporting Information for:

**Significant Enhancement in the Magnetic Properties of  
Cr<sub>2</sub>Te<sub>3</sub> Nanosheets by Atoms Substitution Doping**

**Juanjuan Wang<sup>a,b,c</sup>, Bin Qin<sup>a,c</sup>, Huirong Li<sup>a,c</sup>, Yuxin Zhang<sup>a,c</sup>, Huan Yang<sup>a,c</sup> and**

**Fang Wang<sup>\*,a,c</sup>**

*<sup>a</sup> Key Laboratory of Magnetic Molecules and Magnetic Information Materials of  
Ministry of Education & School of Chemistry and Materials Science of Shanxi  
Normal University, Taiyuan 030032, China*

*<sup>b</sup> Department of Chemical and material Engineering, Lyuliang University, Lishi  
033001, China*

*<sup>c</sup> Collaborative Innovation Center for Shanxi Advanced Permanent Magnetic  
Materials and Technology & Research Institute of Materials Science of Shanxi  
Normal University, Taiyuan 030032, China*

\*E-mail: [wangfanghc@sxnu.edu.cn](mailto:wangfanghc@sxnu.edu.cn).

This file includes Figure S1-S4 and Table S1.

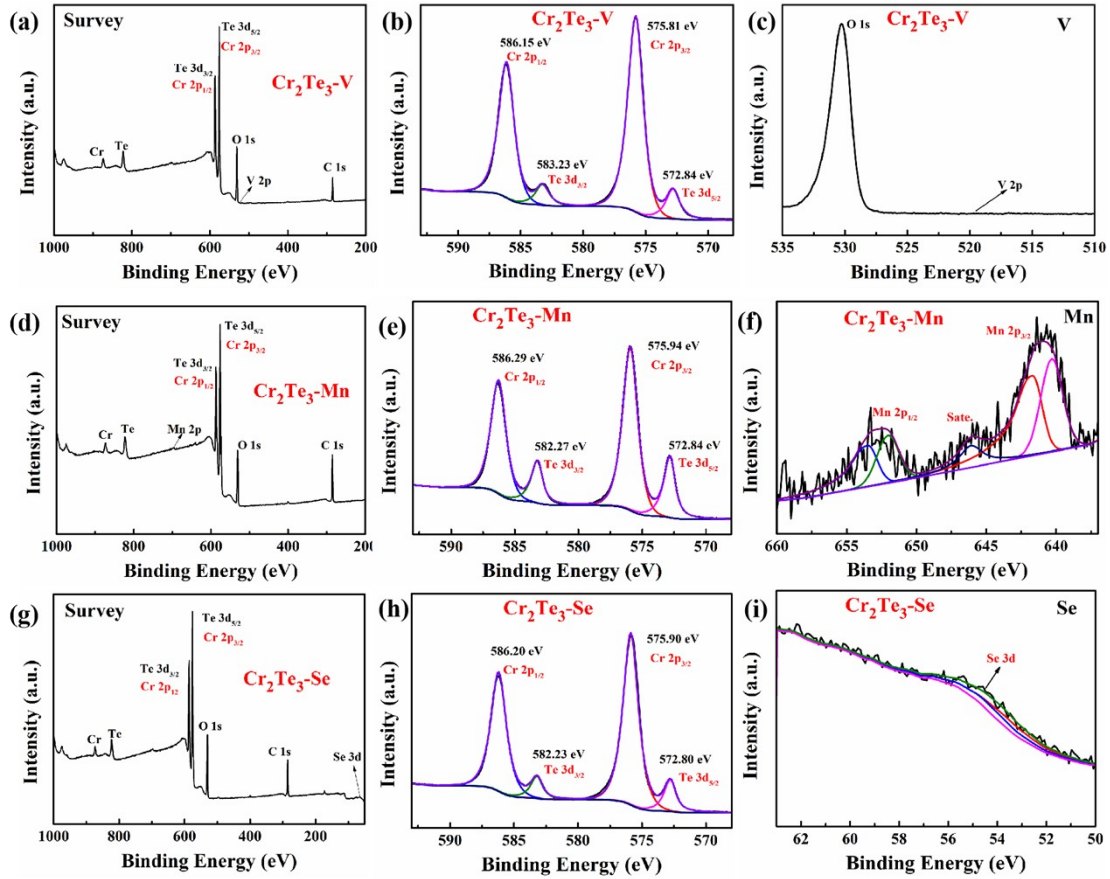

**Figure S1** Low resolution XPS survey, High-resolution XPS spectra of Cr  $2p$ , Te  $3d$ , and M (V  $2p$ , Mn  $2p$  and Se  $3d$  for (a-c)  $\text{Cr}_2\text{Te}_3\text{-V}$ , (d-f)  $\text{Cr}_2\text{Te}_3\text{-Mn}$ , (g-i)  $\text{Cr}_2\text{Te}_3\text{-Se}$ .

It is clear from the XPS diagram that the peaks of Cr and Te are slightly shifted when impurities are introduced into the system, which differs from the original the peaks located at 576.2 eV ( $2p_{3/2}$ ) and 586.5 eV ( $2p_{1/2}$ ) correspond to  $\text{Cr}^{3+}$ , while those at 572.3 eV ( $3d_{5/2}$ ) and 582.6 eV ( $3d_{3/2}$ ) belong to  $\text{Te}^{2-}$ . In addition, the M impurity peaks (V, Mn and Se) are not clearly visible due to the low doping levels. Even in the case of the V impurity peak, the oxygen peak dominates, making the V peak unrecognisable.

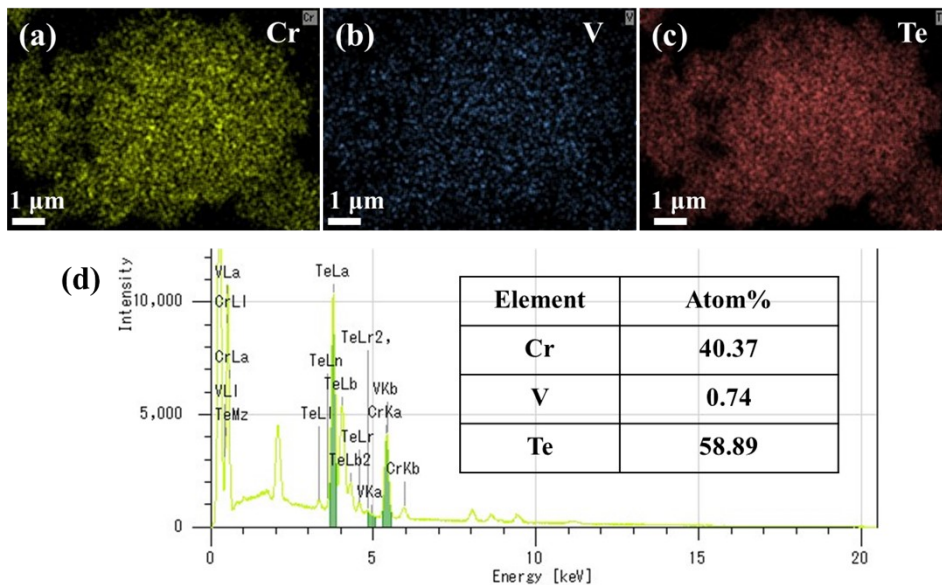

**Figure S2** Typical SEM elemental mapping and EDX of Cr, V, and Te for  $\text{Cr}_2\text{Te}_3\text{-V}$  sample.

SEM elemental mapping and EDX analysis of the  $\text{Cr}_2\text{Te}_3\text{-V}$  nanosheet show that the elements Cr, V and Te are uniformly distributed. This indicates that the elemental composition ratio of  $\text{M}'$  (Cr, V):Se is close to 2:3, consistent with the  $\text{Cr}_2\text{Te}_3$  nanostructure, and that a small amount of V is doped into the structural system.

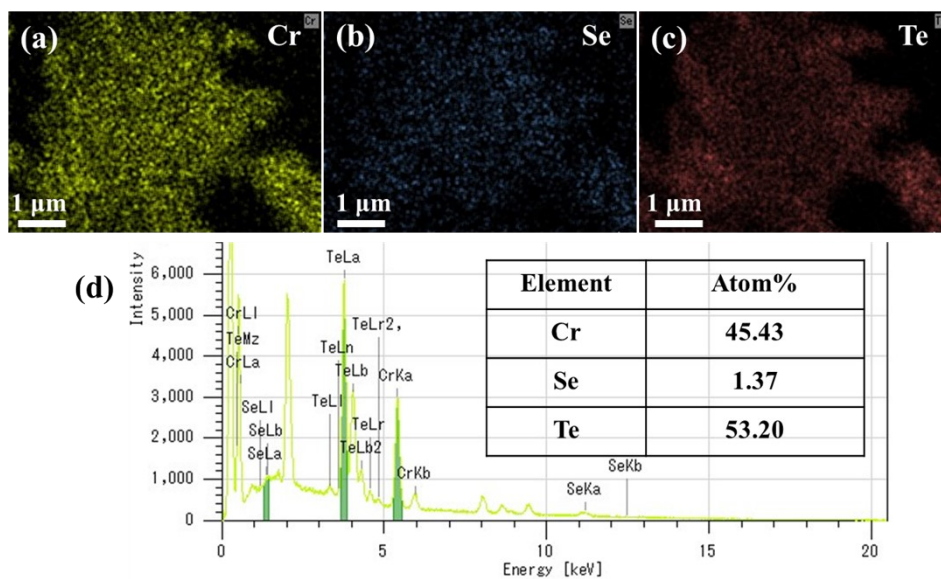

**Figure S3** Typical SEM elemental mapping and EDX of Cr, Se, and Te for  $\text{Cr}_2\text{Te}_3$ -Se sample.

SEM elemental mapping and EDX analysis of the  $\text{Cr}_2\text{Te}_3$ -Se nanosheet show that the elements Cr, Se and Te are uniformly distributed. This indicates that the elemental composition ratio of Cr:(Se, Te) is close to 2:3, consistent with the  $\text{Cr}_2\text{Te}_3$  nanostructure, and that a small amount of Se is doped into the structural system.

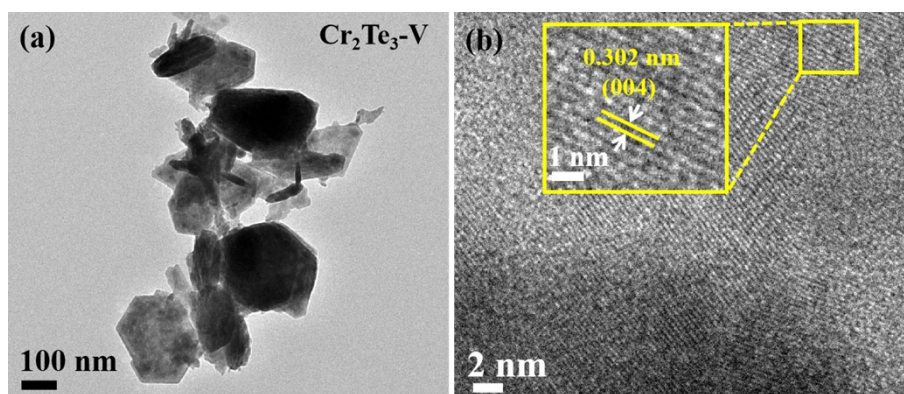

**Figure S4** HRTEM and TEM images of  $\text{Cr}_2\text{Te}_3\text{-Mn}$  sample.

**Table S1** Comparison of the magnetic properties of the actual prepared  $\text{Cr}_2\text{Te}_3$  nanosheets at 100 K.

|                 | $\text{Cr}_2\text{Te}_3$ | $\text{Cr}_2\text{Te}_3\text{-V}$ | $\text{Cr}_2\text{Te}_3\text{-Mn}$ | $\text{Cr}_2\text{Te}_3\text{-Se}$ |
|-----------------|--------------------------|-----------------------------------|------------------------------------|------------------------------------|
| $H_C$ / (kOe)   | 3.74                     | 5.57                              | 3.91                               | 3.85                               |
| $M_r$ / (emu/g) | 2.41                     | 15.18                             | 16.38                              | 8.37                               |
| $M_S$ / (emu/g) | 4.59                     | 21.73                             | 23.02                              | 11.14                              |
